# Supplementary material for: Small mammal personalities generate context dependence in the seed dispersal mutualism
Source: PubMed Central journal article supplement — Proc Natl Acad Sci U S A. 2022 Apr 4;119(15):e2113870119. doi: 10.1073/pnas.2113870119 (PMC9169644; doi:10.1073/pnas.2113870119), 2022-04-04
Supplement: pnas.2113870119.sapp.pdf [file pnas.2113870119.sapp.pdf]

1  
2  
3  
4  
5  
6  
7  
8  
9  
10  
11  
12  
13  
14  
15  
16  
17  
18  
19  
20  
21  
22  
23  
24  
25  
26  
27  
28  
29  
30  
31  
32  
33

**Supplementary Information for**  
Small mammal personalities generate context dependence in the  
seed dispersal mutualism.

Allison M. Brehm, Alessio Mortelliti

Allison M. Brehm  
Email: allibrehm@gmail.com

**This PDF file includes:**

- Movie S1 Legend
- Appendix S1 - Supplementary Methods
- Figures S1 to S5
- Tables S1 to S6
- SI References

34 **Supplemental Movie S1 Legend**  
35 **Movie S1.** How were interactions attributed to individual mice?

## 36 **Appendix S1**

37 Experiments in this study were approved by the University of Maine's Institutional Animal Care  
38 and Use Committee (IACUC numbers A2018-11-01 and A2015-11-02).

39

## 40 **Supplementary Methods**

### 41 **Study site**

42 The Penobscot Experimental Forest is a 1578 ha Forest Service experimental forest. Here,  
43 different forest units have been logged separately, managed with contrasting silvicultural  
44 treatments, and replicated twice in a randomized experimental design. Due to the contrasting  
45 silvicultural systems, these forest units differ greatly in the understory density, diameter of trees  
46 present, light levels, and quantity of downed woody material and snags. Approximately 25 ha of  
47 forest has been retained in two separate units and left unmanaged since the late 1800s to serve  
48 as reference. Common coniferous tree species include balsam fir (*Abies balsamea*), red spruce  
49 (*Picea rubens*), eastern white pine (*Pinus strobus*), and eastern hemlock (*Tsuga canadensis*),  
50 and deciduous species include red maple (*Acer rubrum*), American beech (*Fagus grandifolia*),  
51 Northern red oak (*Quercus rubra*), and birch and aspen (*Betula and Populus spp.*)

52 In this study, we performed small mammal trapping in six different areas of the experimental  
53 forest. Four areas were located in two contrasting silvicultural treatments (a uniform shelterwood  
54 cut using a two-stage overstory removal [treatment 1], and an irregular shelterwood cut using a  
55 two-stage overstory removal and retaining reserves, or trees from the older cohort [treatment 2].  
56 We also used the two areas of unmanaged forest as reference sites. The area of the treatments  
57 used in this study was 12.8 ha on average (range: 9.49 – 19.39 ha).

### 58 **Behavioral assays**

59 Following capture an animal was transferred directly from the trap of capture into a clean, empty  
60 Longworth trap. This trap was then placed into a box sized 46 x 46 x 50 cm. To create a more  
61 natural environment, the inside of the box was painted brown with a small amount of debris (dead  
62 leaves and pine needles) placed on the floor. The box was placed underneath a tarp to control for  
63 light levels and canopy cover. A digital camera (Nikon CoolPix S3700) was mounted facing the  
64 opening of the Longworth trap, and the observer locked the trap door open before leaving the test  
65 area. A clear plexiglass lid was placed over the box to prevent escapes. After three minutes, the  
66 observer returned and ended the emergence test. Individuals were caught in a 4-liter plastic bag  
67 and then immediately released into the center of the open field arena.

68 A five-minute open-field test was performed in an arena of dimensions 46 x 46 x 50 cm, placed  
69 on a level platform with light levels controlled. After five minutes, the animal was caught in a 4-  
70 liter plastic bag and the observer suspended the bag into the open field test to control the visual  
71 surroundings. The observer then performed the handling bag test and measured the proportion of  
72 time that the individual spent immobile for 1 minute (referred to as handling time hereafter). Traps  
73 used for emergence tests and the open-field test box were cleaned thoroughly with 70% isopropyl  
74 alcohol and wiped with a dry cloth in-between all tests. After all three behavioral assays were  
75 complete (on average, this took approximately 10 minutes including time to transfer the animal

76 between tests), the animal was processed (tagged and morphometrics measured) and promptly  
77 released at the point of capture.

## 78 **Quantifying behavior**

79 To quantify behavior from videotaped emergence and open-field tests, recordings were played  
80 back in the laboratory. For emergence tests, an observer recorded whether the animal emerged  
81 (defined as all four feet having left the Longworth trap), the latency to emerge, and the total time  
82 spent at the end of the Longworth tunnel before emerging. When an individual did not emerge  
83 from the test after the three-minute cutoff, the latency to emerge was set to 1.25x the maximum  
84 test length (this occurred in 156 tests out of 1164 total). Open-field tests were analyzed using the  
85 behavioral tracking software ANY-maze © (version 5.1; Stoelting CO, USA). The following  
86 behavioral variables were obtained from the behavioral assays: handling time (the number of  
87 seconds immobile in a handling test; note that the term handling time should not be confused with  
88 a term sometimes used in ecological literature to indicate the time spent handling, processing,  
89 and consuming food items), latency to emerge and time at tunnel end (from the emergence test),  
90 mean speed, rear rate, proportion of time grooming, and proportion of time in the center (from the  
91 open-field test). See Table S3 (modified from [1]) for a complete list of the behaviors used, their  
92 description and interpretation, and supporting sources.

## 93 **Seed experiments – further details**

94  
95 Seeds used in this study included Northern red oak (*Quercus rubra*), Eastern white pine (*Pinus*  
96 *strobus*), and American beech (*Fagus grandifolia*). These three seed species were chosen  
97 because they are present at our study sites, they represent a variety of sizes (while being large  
98 enough to track using the fluorescent powder method), and they represent seeds whose primary  
99 dispersal method includes both wind and animal dispersal. Seeds were purchased from F.W.  
100 Schumacher Co., Inc. and cold stratified over the winter.

101 Presentation stations were placed on the forest floor and we mounted a trail camera  
102 (Reconyx XR6 Ultrafire) 1.25 to 1.5 meters above the station. Cameras were formatted to take 30  
103 second 1080P HD videos (at 30 fps) and an 8-megapixel photograph prior to the start of the video  
104 and once per hour. The cameras were set to the shortest delay between videos (1 s). To identify  
105 individual small mammals, we used a permanent radio frequency identification (RFID) reader to  
106 scan and identify individuals marked with PIT tags (RFIDLOG dual animal tag rfid data logger).  
107 An antenna (Priority1 rfidcoil – 160a) was mounted to each presentation station and positioned to  
108 surround the seed presentation trays (Figure 4D). These antennas were built to operate at a  
109 frequency of 134.2 kHz for optimal reading of PIT tags used in this study. Records were stored  
110 automatically on an SD memory card along with a time stamp of the detection.

111 To allow for the relocation of seeds removed from the stations, we dusted the vinyl floor  
112 tiles with UV fluorescent tracking powder (TechnoGlow; yellow, firehouse orange, or magenta).  
113 These pigments are made of earth friendly materials and shine brightly under UV light. Small  
114 mammals would leave distinct fluorescent trails when dispersing seeds from the seed stations (2).  
115 To permit located caches to be matched to the individual disperser, each oak and beech seed  
116 was painted with non-toxic, UV fluorescent paint (Neon Glow, ASTM D-4236 certified). Each seed  
117 at a site was painted a different color, and the location of each color on the presentation tray  
118 (randomly chosen and rotated between stations), as well as the mass of beech and oak seeds  
119 were recorded when stations were set. When a seed was found, the color allowed us to match  
120 the cache to the individual small mammal observed dispersing it in trail camera videos. For white  
121 pines, five seeds were placed in each of the six wells and all five seeds in a well were painted the  
122 same color. Since several white pine seeds can be dispersed at a time, caches were identified by  
123 matching the count of each different color seed found within the cache to the seeds seen taken in  
124 videos (Figure 4F, G). Since all experiments were performed in complete darkness, seed color  
125 should not have influenced the initial decision to consume or cache the seed.

126 On average we ran four or five experiment sites at one time and performed the  
127 experiment at a trapping grid for 3-4 days. In total, we placed 52 seed sites in September (eight

128 sites at two grids and nine sites at four grids) and 51 in October (eight sites at three grids and  
129 nine sites at three grids).

130 After completion of the seed experiments, we simulated five caches outside of four of our  
131 trapping grids. Half of these caches contained one painted beech seed, and the other half  
132 contained one unpainted beech seed. We monitored these caches using trail cameras over 11  
133 days and confirmed using a two-sample t-test that the chance of a cache being pilfered or  
134 recovered is not influenced by our methods of tagging seeds with paint (p-value comparing the  
135 chance of painted vs. unpainted seeds being pilfered within 24 hours = 0.178; p-value comparing  
136 cache longevity of painted vs. unpainted seeds = 0.219). We acknowledge that we did not  
137 specifically test whether the different colors of paint would have an effect on an individual's choice  
138 to consume or cache a seed, but given the fact that all experiments were performed in the  
139 complete darkness of the forest, we have no reason to believe this should have occurred.

140  
141

### 142 **Playback of seed videos**

143

144 From the trail camera videos obtained at the seed presentation stations, we recorded each visit to  
145 the seed stations, noting the identity of each individual and the nature of their interaction (i.e.,  
146 which seed species they chose, whether they chose to consume it at the site or remove it, and  
147 the color of the seed they chose). We deemed behavior as an "interaction" with a seed if the  
148 individual intentionally made contact with the seed. Individual identification was confirmed using  
149 both the time-stamped RFID reads and the unique haircut seen in the trail cam videos.

150

### 151 **Repeatability analyses**

152 We calculated the adjusted repeatability (3) and associated 95% confidence intervals for seven  
153 key behaviors performed in the standardized assays using the 'rptR' package in R (4). For this  
154 analysis we used only individuals who had two or more repeated observations. Repeatability can  
155 be defined as the proportion of the total phenotypic variation that can be attributed to individual  
156 differences (5–7). Practically, this means that repeatability equals the between-individual variance  
157 divided by the total phenotypic variance (between-individual variance + within-individual  
158 variance). The random intercept of individual ID was included in the models and fixed effects  
159 included sex, body condition index (calculated using the scaled-mass index [6]), silvicultural  
160 treatment, and trapping session. In all models, we used 1000 parametric bootstraps and 100  
161 permutations. We assessed normality by visually inspecting Q-Q plots and by plotting the fitted  
162 values against the residual values and used Box-Cox transformations on the response variable to  
163 approach normality when necessary (9, 10). We considered any behavioral trait with a 95% CI for  
164 repeatability that excluded zero to be a personality trait (6), but we emphasize that this  
165 classification as significantly repeatable does not say anything about the strength of repeatability.

166 After we confirmed that our behavioral variables were significantly repeatable, we took  
167 steps to account for the within-individual variability that occurs between repeated behavioral  
168 observations (consistent with methods used by [11, 12]). We calculated an individual's best linear  
169 unbiased predictor (BLUP) for each of the behavioral variables after controlling for the variation  
170 due to sex, body condition, forestry treatment, and trapping session. We then calculated an  
171 individual's mean BLUP for each of the repeatable behavioral variables (estimated over 1000  
172 simulations using the *sim* function in package *arm* [13]). We then used the mean BLUPs as the  
173 personality covariates in our linear models and mixed-effects models.

174 Further, before moving forward with model selection, we screened all seven behavioral  
175 variables for correlation before analysis (using  $R < 0.7$  as a threshold, consistent with [14]). See  
176 Table S6 for pairwise correlations between all behavioral variables used in model selection.

177  
178

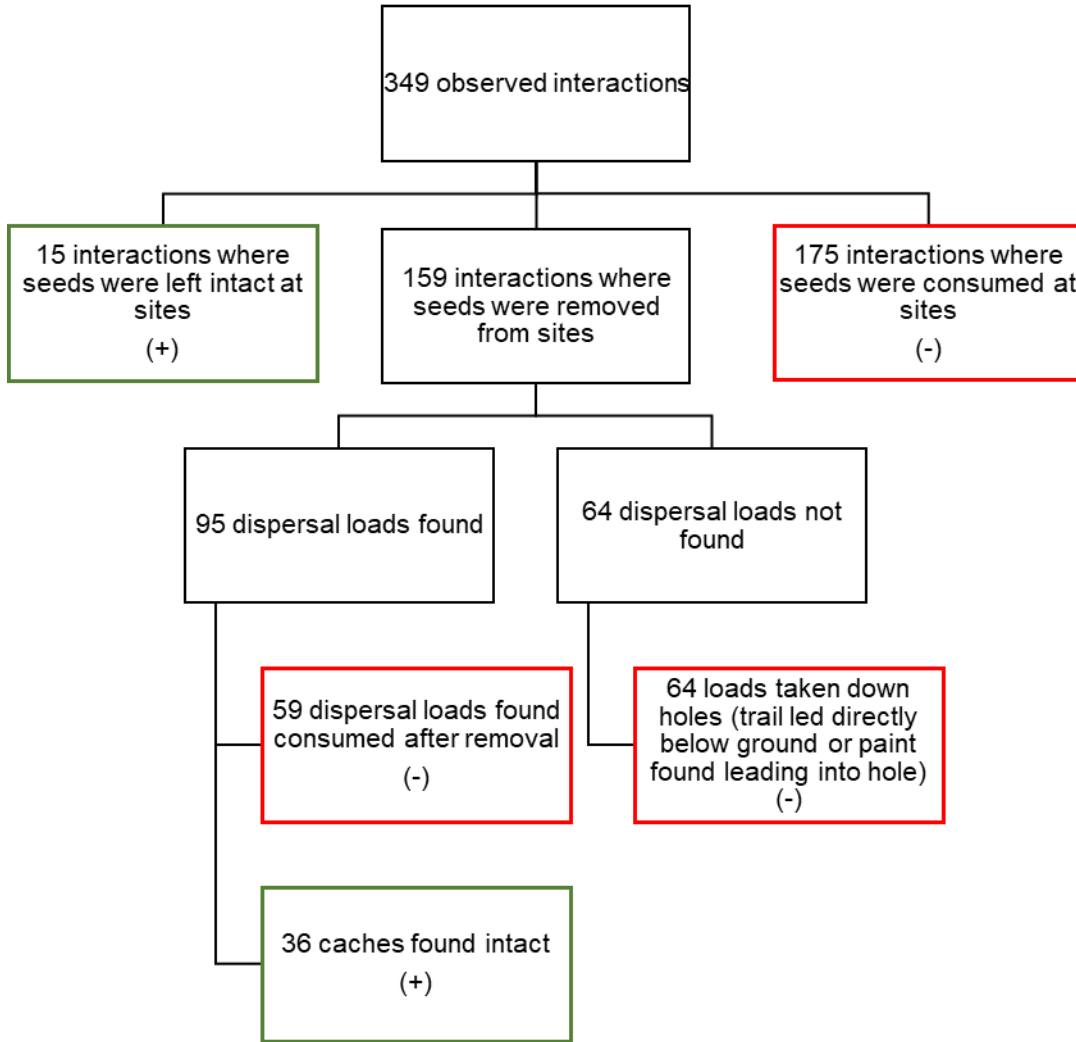

179  
 180  
 181  
 182  
 183

**Figure S1.** White pine (*Pinus strobus*) interaction diagram showing the number of interactions made by deer mice (*Peromyscus maniculatus*) classified as positive (outlined in green) or negative (outlined in red) and the nature of these interactions.

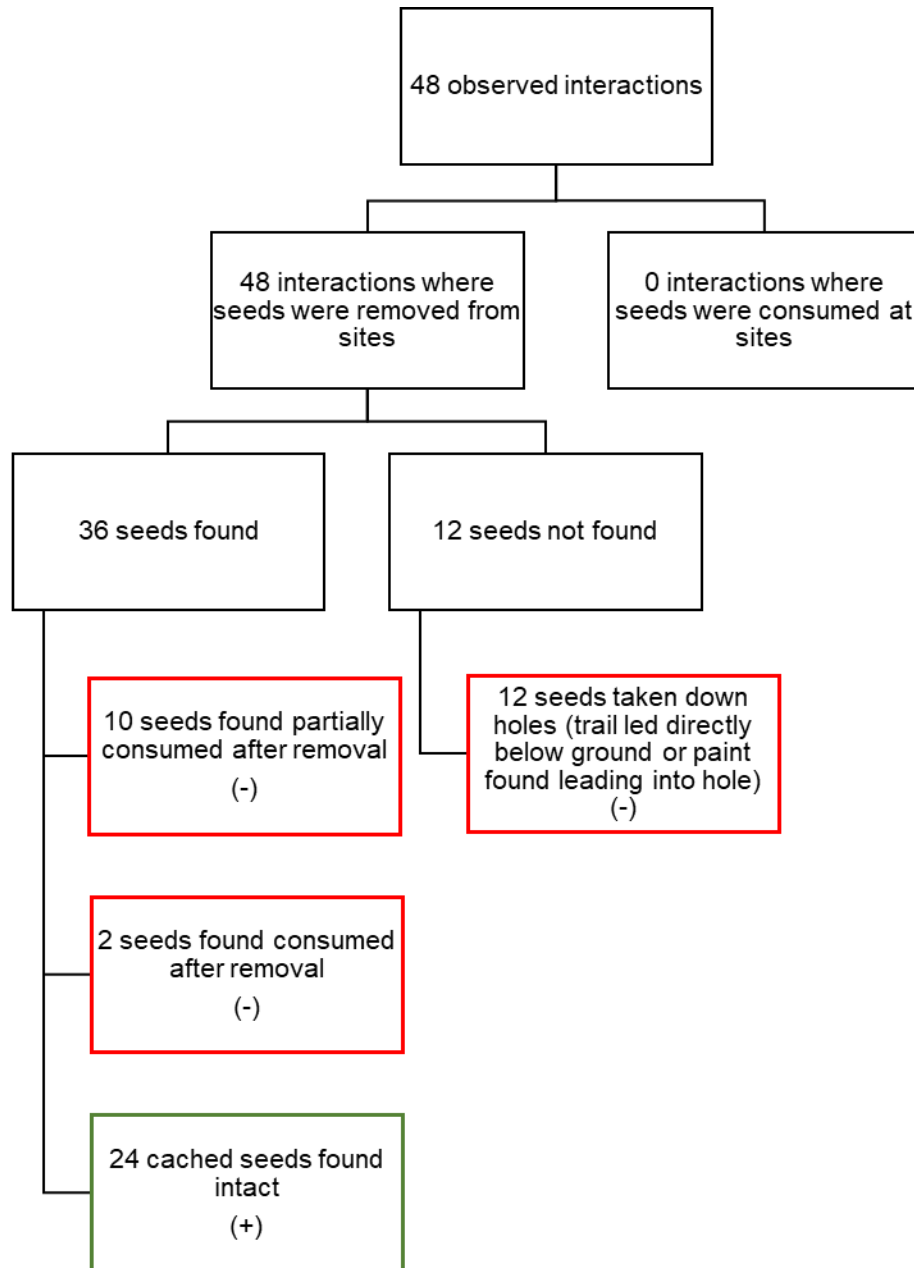

184 **Figure S2.** Red oak (*Quercus rubra*) interaction diagram showing the number of interactions  
 185 made by deer mice (*Peromyscus maniculatus*) classified as positive (outlined in green) or  
 186 negative (outlined in red) and the nature of these interactions.  
 187

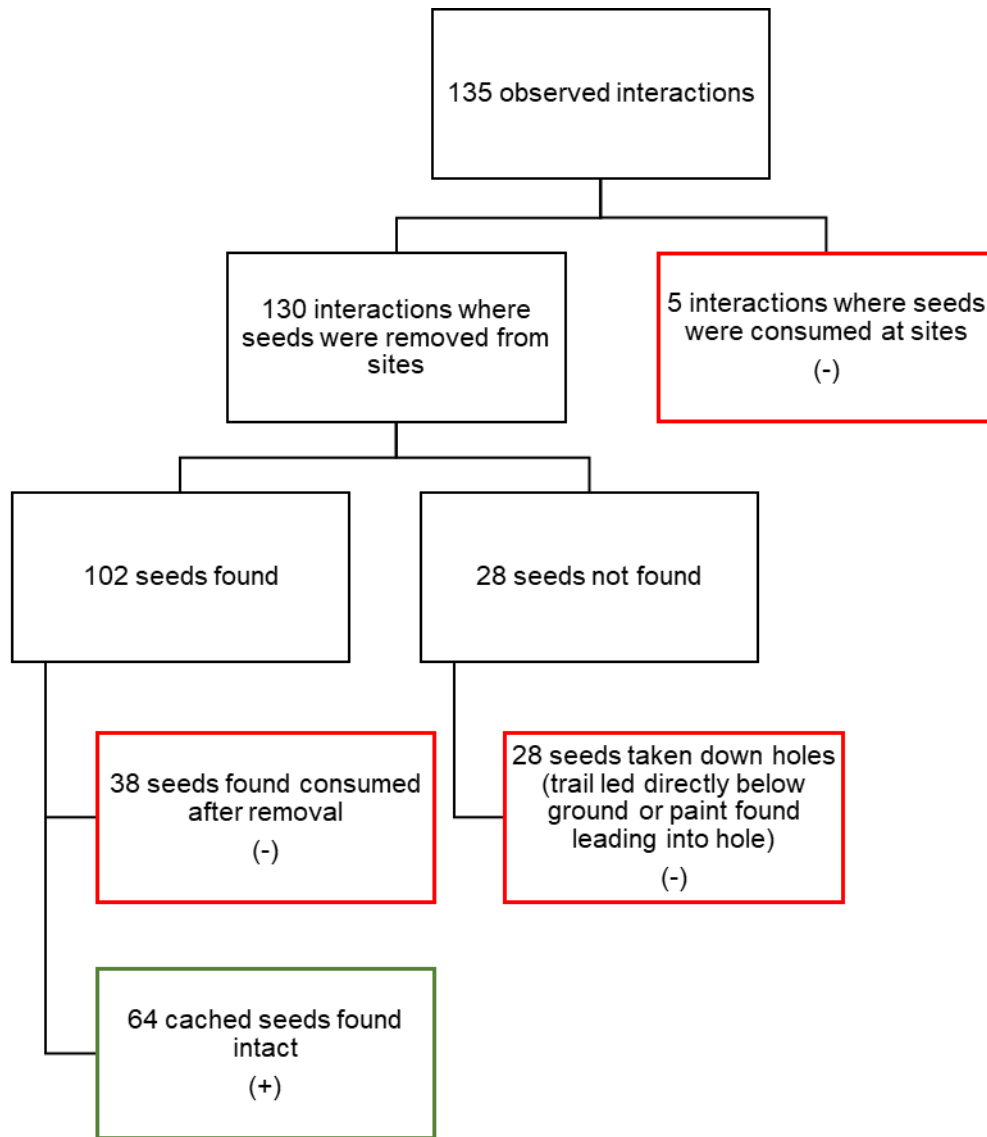

188 **Figure S3.** American beech (*Fagus grandifolia*) interaction diagram showing the number of  
 189 interactions made by deer mice (*Peromyscus maniculatus*) classified as positive (outlined in  
 190 green) or negative (outlined in red) and the nature of these interactions.

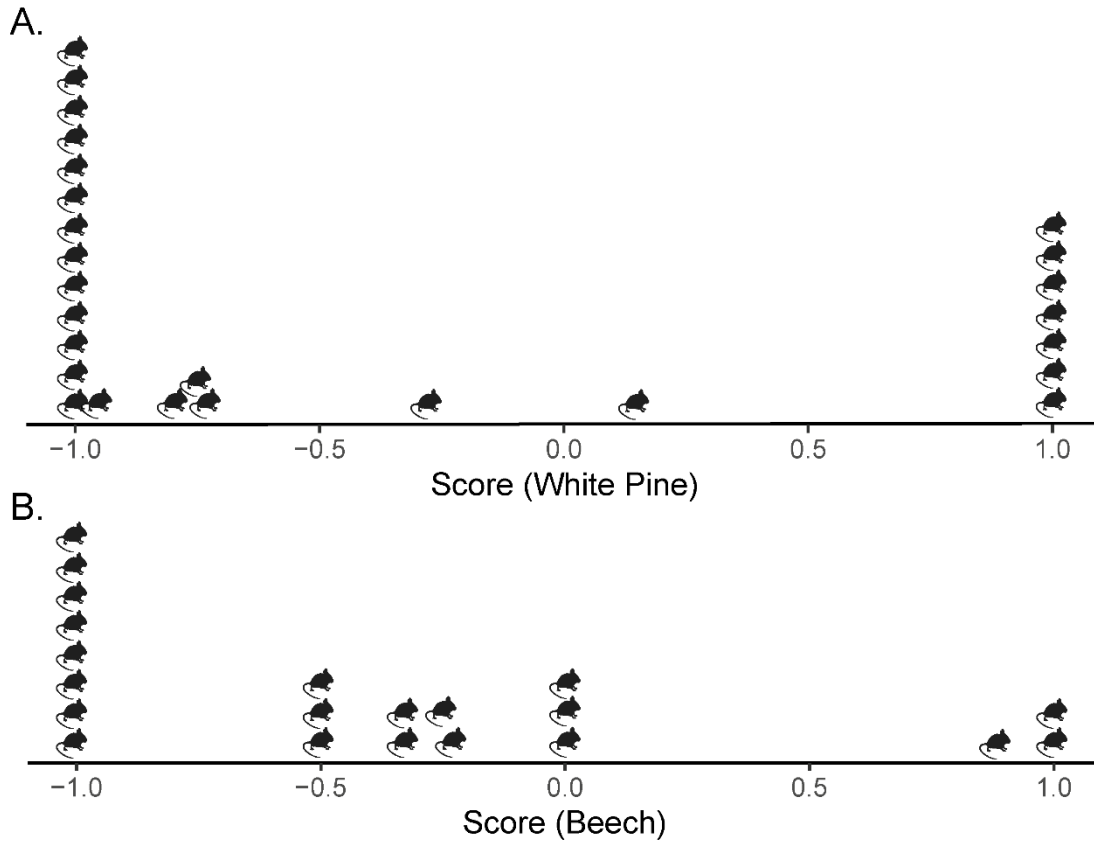

191 **Figure S4.** Individual scores for *Peromyscus maniculatus* along the antagonism-mutualism  
 192 continuum for (A) eastern white pine (*Pinus strobus*; mean score = -0.36) and (B) American  
 193 beech (*Fagus grandifolia*; mean score = -0.37).  
 194



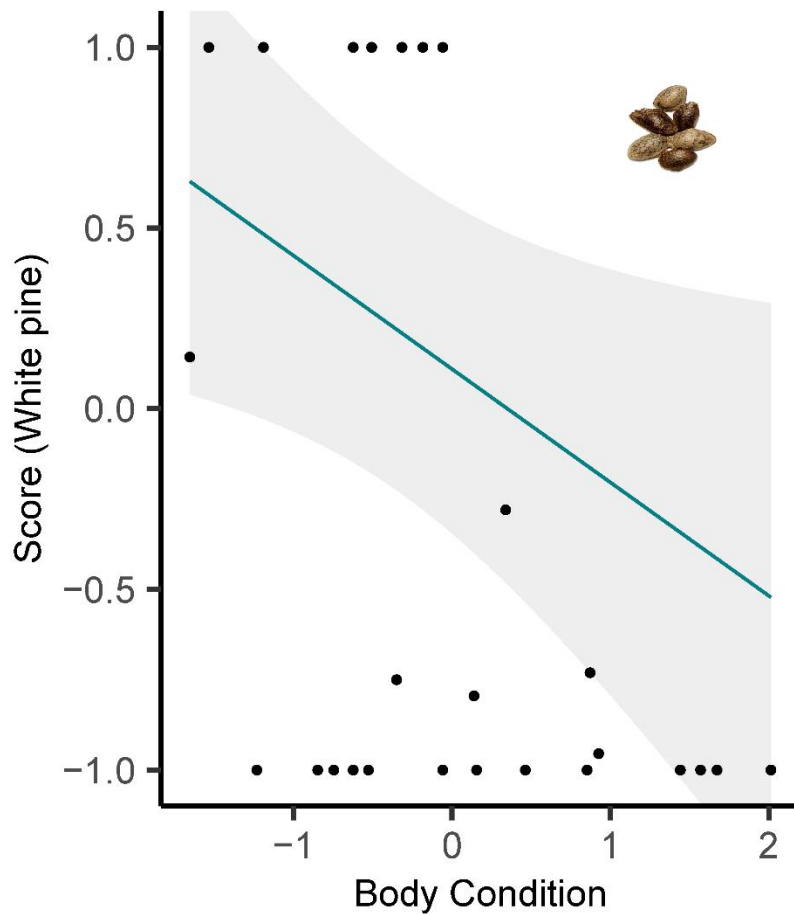

195 **Figure S5.** Predicted relationships (and 95% CIs) between an index of body condition and an  
 196 individual's score along the antagonism-mutualism continuum. Individual *Peromyscus*  
 197 *maniculatus* with a higher body condition index have lower (more antagonistic) scores for eastern  
 198 white pine (*Pinus strobus*;  $\beta = -0.31 \pm 0.15$  SE). Data points represent observed values (one point  
 199 per individual). Body condition index represents a scaled-mass index and values were z-  
 200 standardized. Relationship between body condition index and white pine score is shown for the  
 201 treatment 2 forest type.

202 **Table S1.** Interactions used to calculate an individual's score along the antagonist/mutualist  
203 continuum.

| <b>Action</b>                                   | <b>Positive or Negative</b> |
|-------------------------------------------------|-----------------------------|
| Seed consumed at the site                       | Negative                    |
| Seed removed from site and cached intact        | Positive                    |
| Seed removed from site and then consumed        | Negative                    |
| Seed removed from site and taken down a hole    | Negative                    |
| *Seed left intact at the site after interaction | *Positive                   |

The score can be quantified as the proportion of interactions that are positive minus the proportion of interactions that are negative.

\* This behavior was observed regularly for white pine seeds only. Further, white pine seeds are primarily wind dispersed, so for this species a non-consumption/rejection can be considered positive.

204  
205

206  
207  
208

**Table S2.** Repeatability estimates for target behaviors measured in three behavioral assays (open field, handling bag, and emergence tests) in deer mice (*Peromyscus maniculatus*).

| Behavior                         | Mean  | Range     | RPT          | (95% CI)              | Observations | Individuals |
|----------------------------------|-------|-----------|--------------|-----------------------|--------------|-------------|
| Mean speed (m/sec)               | 0.09  | (0, 0.29) | <b>0.447</b> | <b>(0.371, 0.515)</b> | 815          | 300         |
| Rear rate (rears/sec)            | 0.19  | (0, 0.65) | <b>0.361</b> | <b>(0.285, 0.445)</b> | 819          | 301         |
| Prop time groom <sup>1</sup>     | 0.20  | (0, 0.97) | <b>0.389</b> | <b>(0.312, 0.467)</b> | 818          | 301         |
| Prop time in center <sup>2</sup> | 0.02  | (0, 0.53) | <b>0.280</b> | <b>(0.211, 0.368)</b> | 816          | 301         |
| Handling time (sec)              | 12.82 | (0, 60)   | <b>0.342</b> | <b>(0.268, 0.426)</b> | 749          | 268         |
| Latency to emerge (sec)          | 47.44 | (0, 225)  | <b>0.300</b> | <b>(0.221, 0.386)</b> | 689          | 250         |
| Time at tunnel end (sec)         | 4.67  | (0, 180)  | <b>0.191</b> | <b>(0.104, 0.295)</b> | 617          | 229         |

<sup>1</sup>Proportion of time spent grooming in the open-field test.

<sup>2</sup>Proportion of time spent in center portion of open-field arena.

209  
210

211 **Table S3.** Repeatable behavioral traits from three standard behavioral assays performed on deer  
 212 mice (*Peromyscus maniculatus*). This table provides the description of the behavior, the  
 213 personality trait that this behavior represents, the assay that each trait was obtained from, and  
 214 how values were interpreted. Included is a non-exhaustive list of citations supporting trait  
 215 interpretation. This table was adapted from (1, 15).

| <b>Behavior</b>          | <b>Personality trait</b> | <b>Behavioral assay</b> | <b>Description</b>                                                                                                                               | <b>Interpretation</b>                                          | <b>Sources</b>  |
|--------------------------|--------------------------|-------------------------|--------------------------------------------------------------------------------------------------------------------------------------------------|----------------------------------------------------------------|-----------------|
| Mean speed               | Activity                 | Open field              | Mean speed in the open field test in (m/s). Calculated by dividing the total distance traveled in the test by the test duration                  | Higher values indicate greater activity                        | (16, 17)        |
| Rear rate                | Activity and exploration | Open field              | Rate of rearing (rears/s). Rearing is defined as forelegs leaving the arena floor                                                                | Higher values indicate greater activity and exploration        | (18–21)         |
| Proportion time grooming | Anxiety/stress           | Open field              | Proportion of test duration spent grooming                                                                                                       | Higher values indicate lower anxiety and better coping         | (18, 22, 23)    |
| Proportion time center   | Bold/timid               | Open field              | Proportion of test duration spent in the center portion of the arena                                                                             | Higher values indicate more boldness/less timidity             | (17, 18, 24–27) |
| Handling time            | Docility                 | Handling bag            | Total number of seconds of inactivity during a 1-minute handling bag test                                                                        | Higher values indicate more docility/less defensive aggression | (20, 28–30)     |
| Latency to emerge        | Bold/timid               | Emergence               | Latency (in seconds) to emerge from trap in the emergence test. An animal was considered to have emerged when all four feet left the trap tunnel | Higher values indicate more timidity/less boldness             | (16, 17, 31)    |
| Time at end of tunnel    | Bold/timid               | Emergence               | Total number of seconds spent at the end of the tunnel before emerging                                                                           | Higher values indicate more timidity/less boldness             | (1, 32)         |

216  
 217  
 218

219 **Table S4.** Results from linear regression predicting scores along the predator-mutualist  
 220 continuum in the deer mouse (*Peromyscus maniculatus*) for three target seed species: eastern  
 221 white pine (*Pinus strobus*), red oak (*Quercus rubra*), and American beech (*Fagus grandifolia*).  
 222 Models within 2.0  $\Delta\text{AICc}^1$  of the top model are shown.

| Species                  | Model                                                             | $\Delta\text{AICc}^1$ | Adj. R squared <sup>2</sup> |
|--------------------------|-------------------------------------------------------------------|-----------------------|-----------------------------|
| <i>Pinus strobus</i>     | Body condition + Forest type + Time at tunnel end                 | 0                     | 0.4                         |
|                          | <b>Body condition<sup>3</sup> (-0.31 ± 0.15 SE) + Forest type</b> | 0.5                   | 0.34                        |
| <i>Quercus rubra</i>     | <b>Time at tunnel end (-0.44 ± 0.15 SE)</b>                       | 0                     | 0.29                        |
| <i>Fagus grandifolia</i> | Number of interactions                                            | 0                     | 0.11                        |
|                          | Proportion of time in center                                      | 0.37                  | 0.09                        |
|                          | <b>Null</b>                                                       | 0.67                  | 0                           |
|                          | Forest type                                                       | 1.76                  | 0.11                        |
|                          | Body condition                                                    | 1.97                  | 0.02                        |

223 Models for *P. strobus* include scores from 26 individuals, models for *Q. rubra* include scores from  
 224 19 individuals, and models for *F. grandifolia* include scores from 21 individuals. Effect sizes and  
 225 standard errors shown in parentheses for top models.

226 Behavioral variables in models above represent an individual's average BLUP (i.e. best linear  
 227 unbiased predictor) estimated over 1000 simulations.

228 <sup>1</sup> Delta Akaike information criterion corrected for small sample sizes

229 <sup>2</sup> Adjusted coefficient of determination

230 <sup>3</sup> Body condition index calculated using the scaled-mass index (8)

231

232 **Table S5.** Results for logistic mixed-models predicting the probability of a positive seed  
 233 interaction in the deer mouse (*Peromyscus maniculatus*). Models within 2.0  $\Delta\text{AICc}^1$  of the top  
 234 model are shown.  
 235

| Species                  | Model*                                                                                               | $\Delta\text{AICc}^1$ | Cond. R squared <sup>2</sup> |
|--------------------------|------------------------------------------------------------------------------------------------------|-----------------------|------------------------------|
| <i>Pinus strobus</i>     | <b>Forest type + Body condition<sup>3</sup> (-0.43 ± 0.20 SE) + Time in center (-1.24 ± 0.41 SE)</b> | 0                     | 0.58                         |
| <i>Quercus rubra</i>     | Sex                                                                                                  | 0                     | 0.06                         |
|                          | <b>Null</b>                                                                                          | 0.02                  | 0                            |
|                          | Time at tunnel end                                                                                   | 0.04                  | 0.06                         |
|                          | Body mass                                                                                            | 0.67                  | 0.04                         |
|                          | Rear rate                                                                                            | 1.81                  | 0.01                         |
|                          | Seed mass                                                                                            | 1.98                  | 0.01                         |
| <i>Fagus grandifolia</i> | <b>Time in center (-0.89 ± 0.33 SE)</b>                                                              | 0                     | 0.30                         |

236 Models for *P. strobus* include 349 observations from 26 individuals, models for *Q. rubra* include  
 237 48 observations from 19 individuals, and models for *F. grandifolia* include 135 observations from  
 238 21 individuals. Effect sizes and standard errors shown in parentheses for top models.

239 <sup>1</sup> Delta Akaike information criterion corrected for small sample sizes

240 <sup>2</sup> Conditional (theoretical) coefficient of determination calculated using the *r.squaredGLMM*  
 241 command in the MuMIn package in R

242 <sup>3</sup> Body condition index calculated using the scaled-mass index (8)  
 243

244  
 245  
 246  
 247

**Table S6.** Pairwise correlations between all behavioral variables used in model selection and an individual's mean body condition index (averaged scaled-mass index), and mean body mass. Behavioral variables shown are the mean BLUP (best linear unbiased predictor) averaged over 1000 simulations.

|                                 | <b>1</b> | <b>2</b> | <b>3</b> | <b>4</b> | <b>5</b> | <b>6</b> | <b>7</b> | <b>8</b> | <b>9</b> |
|---------------------------------|----------|----------|----------|----------|----------|----------|----------|----------|----------|
| <b>1</b> - Mean speed           | 1        | 0.64     | -0.62    | 0.18     | -0.24    | -0.33    | -0.13    | -0.06    | -0.10    |
| <b>2</b> - Rear rate            | 0.64     | 1        | -0.54    | 0.09     | -0.18    | -0.27    | -0.12    | -0.08    | -0.13    |
| <b>3</b> - Prop. time grooming  | -0.62    | -0.54    | 1        | -0.16    | -0.05    | 0.11     | -0.08    | 0.07     | 0.10     |
| <b>4</b> - Prop. time in center | 0.18     | 0.09     | -0.16    | 1        | -0.04    | -0.01    | 0        | 0.02     | 0.09     |
| <b>5</b> - Handling             | -0.24    | -0.18    | -0.05    | -0.04    | 1        | 0.31     | 0.22     | 0        | 0.05     |
| <b>6</b> - Latency to emerge    | -0.33    | -0.27    | 0.11     | -0.01    | 0.31     | 1        | 0.41     | 0.02     | 0.09     |
| <b>7</b> - Time at tunnel end   | -0.13    | -0.12    | -0.08    | 0        | 0.22     | 0.41     | 1        | 0.01     | 0.01     |
| <b>8</b> - Mean body condition  | -0.06    | -0.08    | 0.07     | 0.02     | 0        | 0.02     | 0.01     | 1        | 0.41     |
| <b>9</b> - Mean body mass       | -0.10    | -0.13    | 0.10     | 0.09     | 0.05     | 0.09     | 0.01     | 0.41     | 1        |

248  
 249

250  
251  
252  
253  
254  
255  
256  
257  
258  
259  
260  
261  
262  
263  
264  
265  
266  
267  
268  
269  
270  
271  
272  
273  
274  
275  
276  
277  
278  
279  
280  
281  
282  
283  
284  
285  
286  
287  
288  
289  
290  
291  
292  
293  
294  
295  
296  
297  
298  
299  
300  
301  
302  
303  
304  
305

## SI References

1. A. M. Brehm, A. Mortelliti, G. A. Maynard, J. Zydlewski, Land-use change and the ecological consequences of personality in small mammals. *Ecol. Lett.* **22**, 1387–1395 (2019).
2. W. S. Longland, C. Clements, Use of fluorescent pigments in studies of seed caching by rodents. *J. Mammal.* **76**, 1260–1266 (1995).
3. A. J. Wilson, How should we interpret estimates of individual repeatability? *Evol. Lett.* **2**, 4–8 (2018).
4. M. A. Stoffel, S. Nakagawa, H. Schielzeth, rptR: Repeatability estimation and variance decomposition by generalized linear mixed-effects models. *Methods Ecol. Evol.* **8**, 1639–1644 (2017).
5. N. J. Dingemanse, A. J. N. Kazem, D. Re, J. Wright, Behavioural reaction norms: animal personality meets individual plasticity. *Trends Ecol. Evol.* **25**, 81–89 (2009).
6. S. Nakagawa, H. Schielzeth, Repeatability for Gaussian and non-Gaussian data: A practical guide for biologists. *Biol. Rev.* **85**, 935–956 (2010).
7. N. J. Dingemanse, N. A. Dochtermann, Quantifying individual variation in behaviour: mixed-effect modelling approaches. *J. Anim. Ecol.* **82**, 39–54 (2013).
8. J. Peig, A. J. Green, New perspectives for estimating body condition from mass/length data: The scaled mass index as an alternative method. *Oikos* **118**, 1883–1891 (2009).
9. G. E. P. Box, D. R. Cox, An analysis of transformations. *J. R. Stat. Soc. Ser. B* **26**, 211–243 (1964).
10. Y. Yang, O. F. Christensen, D. Sorensen, Analysis of a genetically structured variance heterogeneity model using the Box-Cox transformation. *Genet. Res. (Camb.)* **93**, 33–46 (2011).
11. N. J. Dingemanse, M. Moiron, Y. G. Araya-Ajoy, A. Mouchet, R. N. Abbey-Lee, Individual variation in age-dependent reproduction: fast explorers live fast but senesce young? *J. Anim. Ecol.* **89**, 601–613 (2020).
12. E. Gharnit, P. Bergeron, D. Garant, D. Réale, Exploration profiles drive activity patterns and temporal niche specialization in a wild rodent. *Behav. Ecol.* **31**, 772–783 (2020).
13. A. Gelman, Y.-S. Su, arm: Data analysis using regression and multilevel/ hierarchical models. *R Packag. version 1.10-1* (2018).
14. C. F. Dormann, *et al.*, Collinearity: A review of methods to deal with it and a simulation study evaluating their performance. *Ecography (Cop.)* **36**, 027–046 (2013).
15. A. M. Brehm, A. Mortelliti, Land-use change alters associations between personality and microhabitat selection. *Ecol. Appl.*, in press (2021).
16. A. J. Carter, W. E. Feeney, H. H. Marshall, G. Cowlshaw, R. Heinsohn, Animal personality: what are behavioural ecologists measuring? *Biol. Rev.* **88**, 465–475 (2013).
17. G. Gracceva, *et al.*, Turning shy on a winter's day: effects of season on personality and stress response in *Microtus arvalis*. *Ethology* **120**, 753–767 (2014).
18. E. Choleris, A. W. Thomas, M. Kavaliers, F. S. Prato, A detailed ethological analysis of the mouse open field test: effects of diazepam, chlordiazepoxide and an extremely low frequency pulsed magnetic field. *Neurosci. Biobehav. Rev.* **25**, 235–260 (2001).
19. L. Prut, C. Belzung, The open field as a paradigm to measure the effects of drugs on anxiety-like behaviors: a review. *Eur. J. Pharmacol.* **463**, 3–33 (2003).
20. J. G. A. Martin, D. Réale, Temperament, risk assessment and habituation to novelty in eastern chipmunks, *Tamias striatus*. *Anim. Behav.* **75**, 309–318 (2008).
21. S. Tanaka, J. W. Young, A. L. Halberstadt, V. L. Masten, M. A. Geyer, Four factors underlying mouse behavior in an open field. *Behav. Brain Res.* **233**, 55–61 (2012).
22. A. V. Kalueff, *et al.*, Neurobiology of rodent self-grooming and its value for translational neuroscience. *Nat. Rev. Neurosci.* **17**, 45–59 (2016).
23. A. Fernández-Teruel, C. Estanislau, Meanings of self-grooming depend on an inverted U-shaped function with aversiveness. *Nat. Rev. Neurosci.* **17**, 591 (2016).
24. S. Barnett, *The rat - a study in behavior* (ANU Press, 1976).
25. D. Treit, M. Fundytus, A. M. Fundytus, Thigmotaxis as a test for anxiolytic activity in rats. *Pharmacol. Biochem. Behav.* **31**, 959–962 (1989).



- 306 26. A. Ramos, O. Berton, P. Mormède, F. Chaouloff, A multiple-test study of anxiety-related  
307 behaviours in six inbred rat strains. *Behav. Brain Res.* **85**, 57–69 (1997).
- 308 27. J. A. Eccard, A. Herde, Consistency in boldness, activity and exploration at different  
309 stages of life. *BMC Ecol.* **103**, 61–68 (2013).
- 310 28. A. K. Boon, D. Réale, S. Boutin, The interaction between personality, offspring fitness and  
311 food abundance in North American red squirrels. *Ecol. Lett.* **10**, 1094–1104 (2007).
- 312 29. P. O. Montiglio, D. Garant, F. Pelletier, D. Réale, Personality differences are related to  
313 long-term stress reactivity in a population of wild eastern chipmunks, *Tamias striatus*.  
314 *Anim. Behav.* **84**, 1071–1079 (2012).
- 315 30. R. W. Taylor, S. Boutin, M. M. Humphries, A. G. Mcadam, Selection on female behaviour  
316 fluctuates with offspring environment. *J. Evol. Biol.* **27**, 2308–2321 (2014).
- 317 31. C. Brown, V. A. Braithwaite, Effects of predation pressure on the cognitive ability of the  
318 poeciliid *Brachyraphis episcopi*. *Behav. Ecol.* **16**, 482–487 (2004).
- 319 32. A. M. Brehm, S. Tironi, A. Mortelliti, Effects of trap confinement on personality  
320 measurements in two terrestrial rodents. *bioRxiv* (2019) <https://doi.org/10.1101/723403>.
- 321
